# Supplementary material for: Structural characterization and analysis of different epimers of neutral glycosphingolipid LcGg4 by ion mobility spectrometry-mass spectrometry
Source: Royal Society of Chemistry journal article supplement (doi:10.1039/d2an00224h), 2022-01-01
Supplement: d2an00224h1.pdf [file d2an00224h1.pdf]

## *Supporting Information*

*For*

### **Structural Characterization and Analysis of Different Epimers of Neutral Glycosphingolipid LcGg4 by Ion Mobility Spectrometry-Mass Spectrometry**

Tianqi Gao,<sup>a</sup> Aneirin A. Lott,<sup>b,c</sup> Fanran Huang,<sup>a</sup> Rajendra Rohokale,<sup>a</sup> Qingjiang Li,<sup>a</sup> Hernando J. Olivos,<sup>d</sup> Sixue Chen,<sup>b,c</sup> and Zhongwu Guo<sup>a,\*</sup>

<sup>a</sup>*Department of Chemistry, University of Florida, 214 Leigh Hall, Gainesville, FL 32611, USA*

<sup>b</sup>*Department of Biology, Genetics Institute, University of Florida, Gainesville, FL 32611, USA*

<sup>c</sup>*Plant Molecular and Cellular Biology Program, University of Florida, Gainesville, FL 32610, USA*

<sup>d</sup>*Waters Corporation, 5 Technology Drive, Building B, Milford, MA 01757, USA*

#### **Table of Contents**

|                                                                                                                                                   |      |
|---------------------------------------------------------------------------------------------------------------------------------------------------|------|
| <b>Table S1.</b> LC retention times for all five GSLs-----                                                                                        | SI-2 |
| <b>Figure S1.</b> Total and extracted ion chromatograms of all five GSLs-----                                                                     | SI-3 |
| <b>Figure S2.</b> A stacked view of extracted ion mobilograms for the $[M + H]^+$ ions of the<br>GSL isomers from Bruker timsTOF flex system----- | SI-5 |
| <b>Figure S3.</b> Extracted ion mobilograms for the $[M - H_2O + H]^+$ ions of the GSL isomers<br>by the Bruker timsTOF flex system-----          | SI-4 |
| <b>Figure S4.</b> A stacked view of IMS-MS arrival times of GSL isomers from the<br>Waters Cyclic IMS system -----                                | SI-5 |
| <b>Figure S5.</b> MS/MS spectra of GSLs from the Waters Cyclic IMS-MS/MS -----                                                                    | SI-6 |
| <b>Table S2.</b> The collisional cross section in nitrogen volume for the GSL stereomers -----                                                    | SI-7 |
| <b>Table S3-S7.</b> Matched product ions and assignments for all five GSLs-----                                                                   | SI-8 |

**Table S1.** The LC retention time (Rt) of GalNAc-LcGg4 (d18:1/18:0), LcGg4 (d18:1/18:0), GlcNAc-LcGg4 (d18:1/18:0), GalNAc-LcGg4 (d16:1/18:0), and GalNAc-LcGg4-NBD. All the *m/z* values correspond to [M + H]<sup>+</sup> parent ions.

| GSL ID                    | Rt (min) | Experimental (m/z) | Calculated (m/z) | Deviation (in ppm) |
|---------------------------|----------|--------------------|------------------|--------------------|
| GalNAc-LcGg4 (d18:1/18:0) | 27.7     | 1296.8249          | 1296.8150        | 7.63               |
| LcGg4 (d18:1/18:0)        | 27.7     | 1296.8249          | 1296.8150        | 7.63               |
| GlcNAc-LcGg4 (d18:1/18:0) | 27.7     | 1296.8249          | 1296.8150        | 7.63               |
| GalNAc-LcGg4 (d16:1/18:0) | 23.2     | 1268.7892          | 1268.7838        | 4.26               |
| GalNAc-LcGg4-NBD          | 10.6     | 1376.7267          | 1376.7182        | 5.59               |

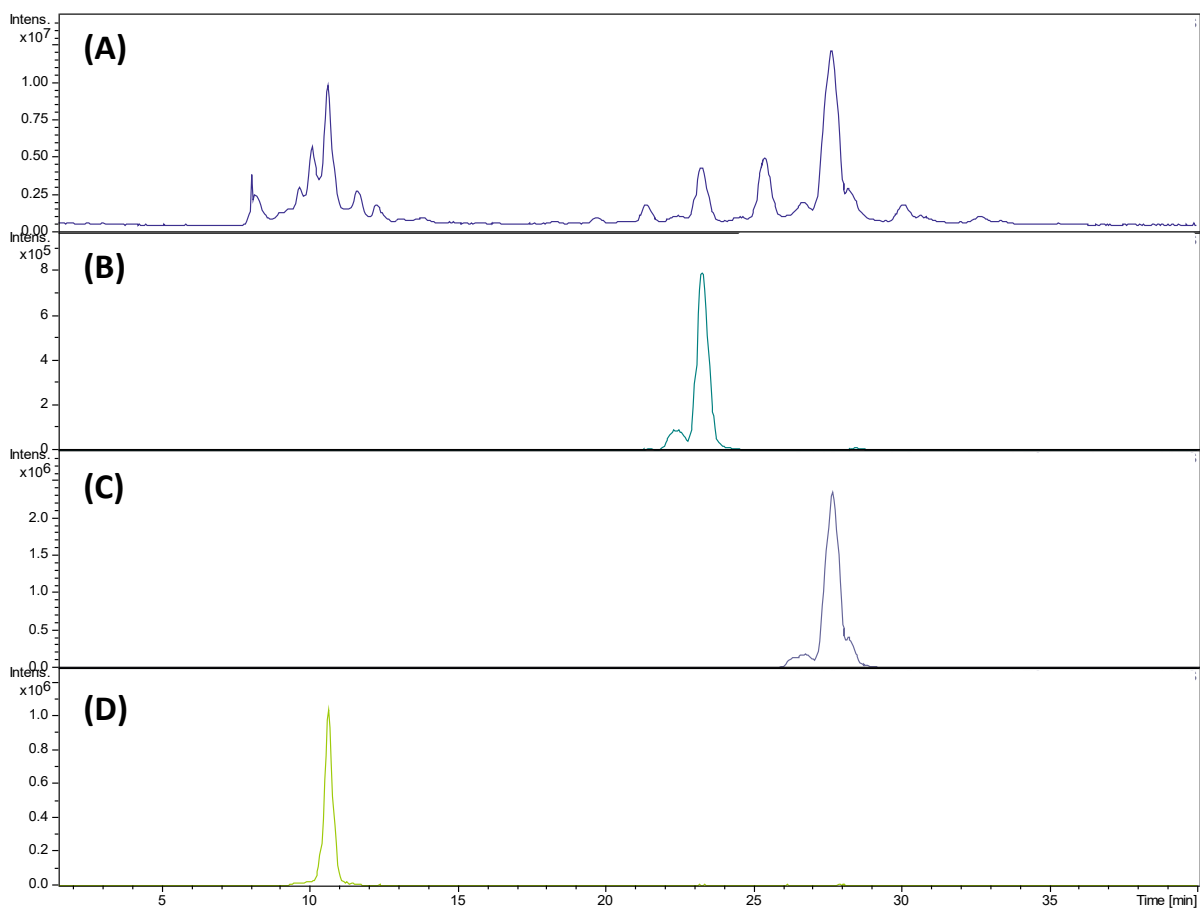

**Figure S1.** Total ion chromatogram (TIC) of the mixture of all 5 GSLs (A). Extracted ICs (EICs) of GalNAc-LcGg4 (d16:1/18:0) (B), LcGg4 (d18:1/18:0), GalNAc-LcGg4 (d18:1/18:0) and GlcNAc-LcGg4 (d18:1/18:0) (C), and GalNAc-LcGg4-NBD (D) from the LC-MS/MS data of their mixture. Different lipid forms can be easily distinguished by LC-MS, whereas all the epimers elude at the same retention time.

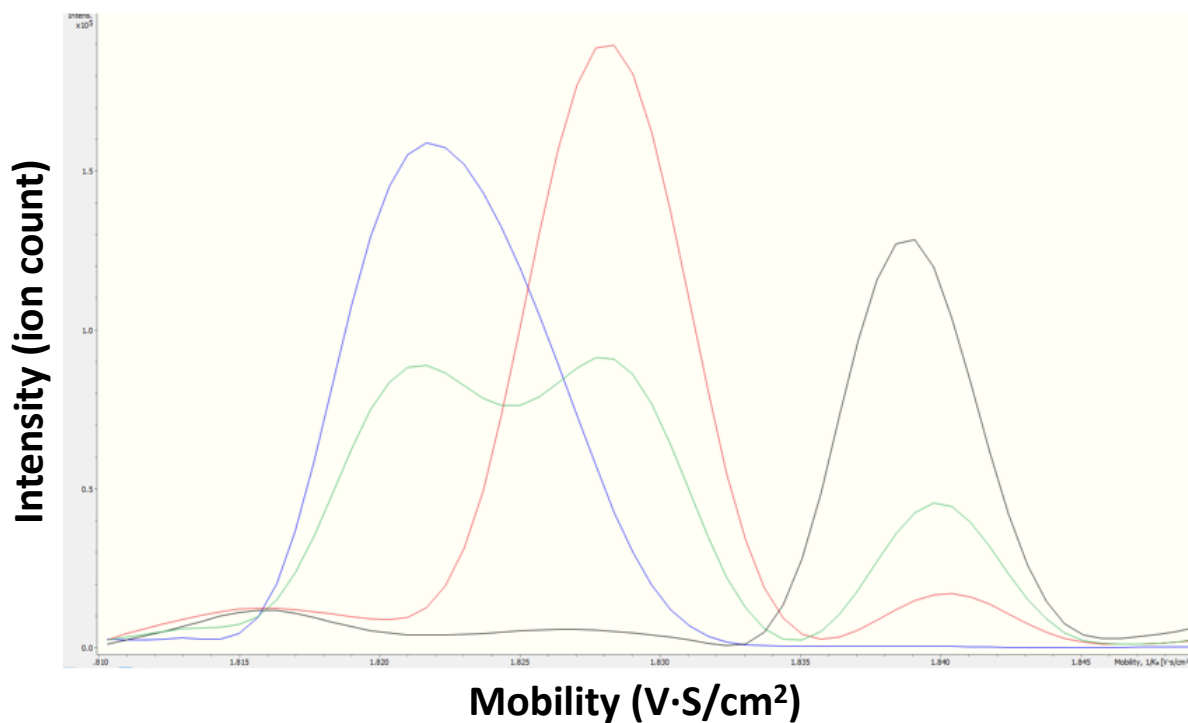

**Figure S2.** Stacked view of the EIMs for the  $[M + H]^+$  ions of isomeric GalNAc-LcGg4 (blue), LcGg4 (red) and GlcNAc-LcGg4 (black) that were individually analyzed by the Bruker timsTOF flex system. The IMS result of their mixture (green) is in good accordance with the individual results.

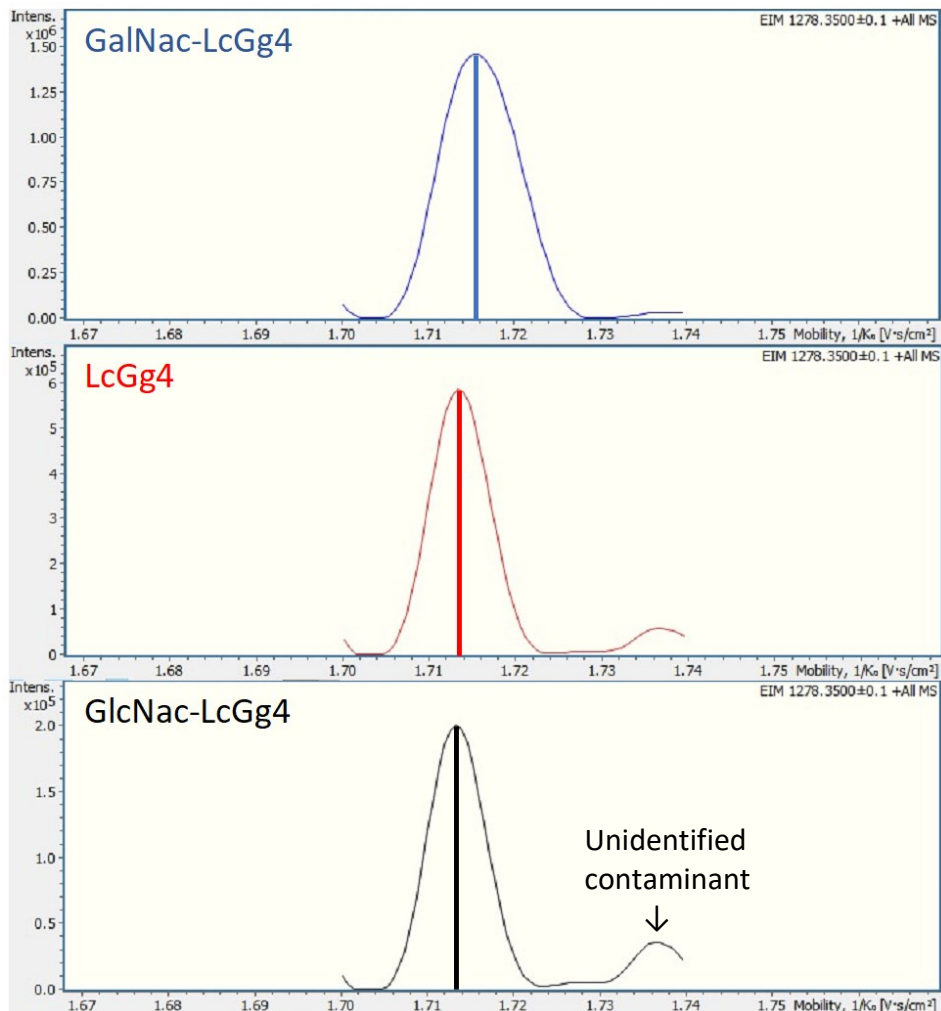

**Figure S3.** Extracted ion mobilograms (EIM) for the  $[M - H_2O + H]^+$  ion of each isomer obtained from the Bruker timsTOF flex system. Differences in mobility were not observed for LcGg4 and GlcNac-LcGg4 (both at  $\sim 1.714 \text{ V}\cdot\text{S}/\text{cm}^2$ ), while GalNac-LcGg4 had a slightly different mobility value ( $\sim 1.716 \text{ V}\cdot\text{S}/\text{cm}^2$ ). The minor peak at  $\sim 1.735 \text{ V}\cdot\text{S}/\text{cm}^2$  belongs to an unidentified contaminant.

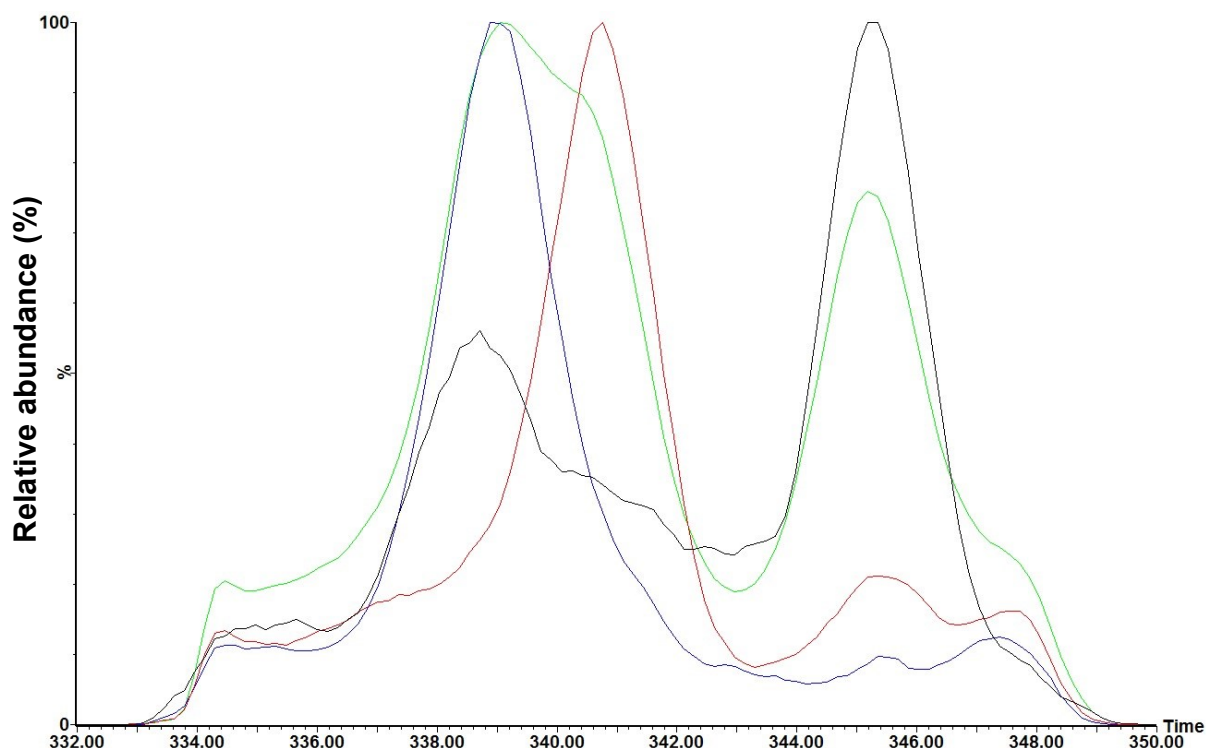

**Figure S4.** A stacked view of the IMS-MS arrival time distributions of GalNAc-LcGg4 (blue), LcGg4 (red), and GlcNAc-LcGg4 (black) analyzed individually, and as a mixture (green), obtained from the Waters Cyclic IMS system.

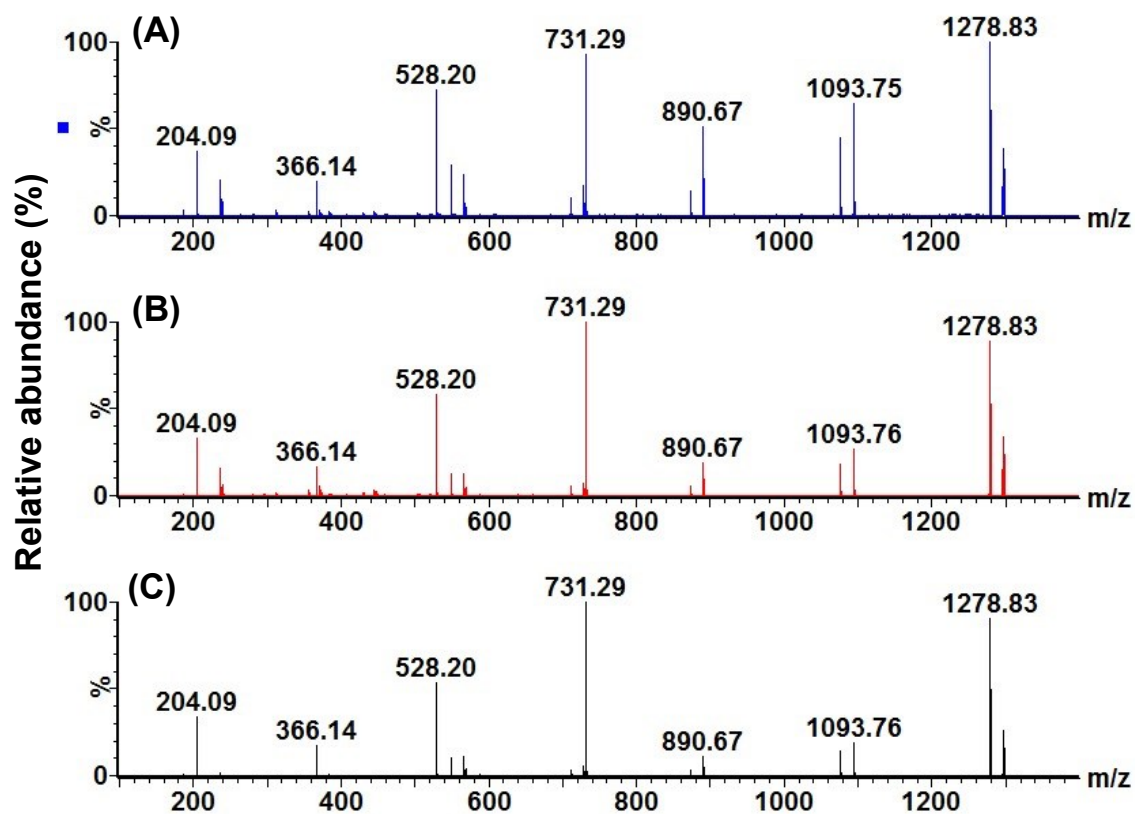

**Figure S5.** MS/MS spectra of GalNAc-LcGg4 (A), LcGg4 (B), and GlcNAc-LcGg4 (C) obtained from the Waters Cyclic IMS-MS/MS system at a 30 eV collision energy using  $[M + H]^+$  ion as the parent ion.

## Studies on collisional cross section in nitrogen

We also used the timsTOF and Cyclic IMS systems to discover the collisional cross section in nitrogen ( $CCS_{N_2}$ ) for each GSL isomer.  $CCS_{N_2}$  is typically a reproducible physical property for each specific ion, determined by the surface area of an ion to interact with carrier gas. The results listed in Table S2 clearly suggest an observable difference among the three isomers. Also, in both systems, the CCS values of three isomers are different by the similar amounts (CCS of GlcNAc-LcGg4 is 2.2 larger than that of LcGg4 and 3.4 larger than that of GalNAc-LcGg4). However, it should be noted that different tune mixtures were utilized for Cyclic IMS and timsTOF following each vendors' recommendations of the best conditions (details about the tune mixtures are given in the experimental section), thus these two sets of CCS values may not be comparable.

**Table S2.** Observed  $CCS_{N_2}$  values for LcGg4, GalNAc-LcGg4, and GlcNAc-LcGg4.

| GSL          | Observed CCS by Cyclic IMS | Observed CCS by timsTOF flex |
|--------------|----------------------------|------------------------------|
| GalNAc-LcGg4 | 378.2                      | 368.8                        |
| LcGg4        | 379.4                      | 370.0                        |
| GlcNAc-LcGg4 | 381.6                      | 372.3                        |



**Table S3.** Matched product ions and fragmentation assignments for GlcNAc-LcGg4 (18:1/18:0). The relative peak intensity (I%) shows the percentage of each ion against the combination of all identified carbohydrate and glycolipid ions.

| <b>Fragmentation Assignment</b>      | <b>Experimental m/z</b> | <b>Theoretical m/z</b> | <b>ppm</b> | <b>I%</b> |
|--------------------------------------|-------------------------|------------------------|------------|-----------|
| <b><i>Carbohydrate fragments</i></b> |                         |                        |            |           |
| B1                                   | 204.0920                | 204.0872               | 23.5       | 19.53     |
| B2Y2a/2b                             | 366.1480                | 366.1395               | 23.2       | 7.24      |
| B3Y2a/2b                             | 528.2029                | 528.1923               | 20.1       | 15.32     |
| B2                                   | 569.2300                | 569.2188               | 19.7       | 1.58      |
| B3                                   | 731.2856                | 731.2717               | 19.0       | 26.63     |
| <b><i>Glycolipid fragments</i></b>   |                         |                        |            |           |
| Z0                                   | 548.5493                | 548.5407               | 15.7       | 4.34      |
| Y0                                   | 566.5629                | 566.5512               | 20.7       | 3.72      |
| Z1                                   | 710.6075                | 710.5935               | 19.7       | 1.75      |
| Y1                                   | 728.6185                | 728.6035               | 20.6       | 2.04      |
| Y2aZ2                                | 872.6605                | 872.6463               | 16.3       | 1.58      |
| Y2ab                                 | 890.6719                | 890.6563               | 17.5       | 3.98      |
| Z2                                   | 1075.7433               | 1075.7251              | 16.9       | 5.49      |
| Y2a/Y2b                              | 1093.7538               | 1093.7357              | 16.5       | 6.81      |

**Table S4.** Matched product ions and fragmentation assignments for LcGg4 (18:1/18:0). The relative peak intensity (I%) shows the percentage of each ion against the combination of all identified carbohydrate and glycolipid ions.

| <b>Fragmentation Assignment</b>      | <b>Experimental m/z</b> | <b>Theoretical m/z</b> | <b>ppm</b> | <b>I%</b> |
|--------------------------------------|-------------------------|------------------------|------------|-----------|
| <b><i>Carbohydrate fragments</i></b> |                         |                        |            |           |
| B1                                   | 204.0913                | 204.0872               | 20.1       | 17.74     |
| B2Y2a/2b                             | 366.1476                | 366.1395               | 22.1       | 5.80      |
| B3Y2a/2b                             | 528.2023                | 528.1923               | 18.9       | 15.48     |
| B2                                   | 569.2296                | 569.2188               | 19.0       | 1.43      |
| B3                                   | 731.2852                | 731.2717               | 18.5       | 26.72     |
| <b><i>Glycolipid fragments</i></b>   |                         |                        |            |           |
| Z0                                   | 548.5502                | 548.5407               | 17.3       | 3.68      |
| Y0                                   | 566.5617                | 566.5512               | 18.5       | 3.38      |
| Z1                                   | 710.6058                | 710.5935               | 17.3       | 1.58      |
| Y1                                   | 728.6182                | 728.6035               | 20.2       | 2.33      |
| Y2aZ2                                | 872.6614                | 872.6463               | 17.3       | 1.90      |
| Y2ab                                 | 890.6722                | 890.6563               | 17.9       | 5.52      |
| Z2                                   | 1075.7443               | 1075.7251              | 17.8       | 5.62      |
| Y2a/Y2b                              | 1093.7549               | 1093.7357              | 17.6       | 8.81      |

**Table S5.** Matched product ions and fragmentation assignments for GalNAc-LcGg4 (18:1/18:0). The relative peak intensity (I%) shows the percentage of each ion against the combination of all identified carbohydrate and glycolipid ions.

| <b>Fragmentation Assignment</b>      | <b>Experimental m/z</b> | <b>Theoretical m/z</b> | <b>ppm</b> | <b>I%</b> |
|--------------------------------------|-------------------------|------------------------|------------|-----------|
| <b><i>Carbohydrate fragments</i></b> |                         |                        |            |           |
| B1                                   | 204.0905                | 204.0872               | 16.2       | 15.94     |
| B2Y2a/2b                             | 366.1451                | 366.1395               | 15.3       | 4.70      |
| B3Y2a/2b                             | 528.2000                | 528.1923               | 14.6       | 13.99     |
| B2                                   | 569.2259                | 569.2188               | 12.5       | 1.01      |
| B3                                   | 731.2822                | 731.2717               | 14.4       | 18.69     |
| <b><i>Glycolipid fragments</i></b>   |                         |                        |            |           |
| Z0                                   | 548.5482                | 548.5407               | 13.7       | 4.57      |
| Y0                                   | 566.5587                | 566.5512               | 13.2       | 4.08      |
| Z1                                   | 710.6023                | 710.5935               | 12.4       | 1.88      |
| Y1                                   | 728.6141                | 728.6035               | 14.5       | 3.28      |
| Y2aZ2                                | 872.6582                | 872.6463               | 13.6       | 2.59      |
| Y2ab                                 | 890.6689                | 890.6563               | 14.1       | 8.09      |
| Z2                                   | 1075.7380               | 1075.7251              | 12.0       | 7.53      |
| Y2a/Y2b                              | 1093.7494               | 1093.7357              | 12.5       | 13.63     |

**Table S6.** Matched product ions and fragmentation assignments for GalNAc-LcGg4 (d16:1/18:0). The relative peak intensity (I%) shows the percentage of each ion against the combination of all identified carbohydrate and glycolipid ions.

| <b>Fragmentation Assignment</b>      | <b>Experimental m/z</b> | <b>Theoretical m/z</b> | <b>ppm</b> | <b>I%</b> |
|--------------------------------------|-------------------------|------------------------|------------|-----------|
| <b><i>Carbohydrate fragments</i></b> |                         |                        |            |           |
| B1                                   | 204.0892                | 204.0872               | 9.80       | 18.89     |
| B2Y2a/2b                             | 366.1415                | 366.1395               | 5.46       | 6.04      |
| B3Y2a/2b                             | 528.1941                | 528.1923               | 3.41       | 14.83     |
| B2                                   | 569.2210                | 569.2188               | 3.86       | 1.13      |
| B3                                   | 731.2689                | 731.2717               | -3.83      | 16.57     |
| <b><i>Glycolipid fragments</i></b>   |                         |                        |            |           |
| Z0                                   | 520.5107                | 520.5094               | 2.50       | 4.64      |
| Y0                                   | 538.5182                | 538.5199               | -3.16      | 4.16      |
| Z1                                   | 682.5627                | 682.5622               | 0.73       | 1.87      |
| Y1                                   | 700.5706                | 700.5722               | -2.28      | 2.71      |
| Y2aZ2                                | 844.6159                | 844.6150               | 1.07       | 2.23      |
| Y2ab                                 | 862.6263                | 862.6250               | 1.51       | 7.97      |
| Z2                                   | 1047.6907               | 1047.6938              | -2.96      | 6.86      |
| Y2a/Y2b                              | 1065.7009               | 1065.7044              | -3.28      | 12.08     |

**Table S7.** Matched product ions and fragmentation assignments for GalNAc-LcGg4-NBD. The relative peak intensity (I%) shows the percentage of each ion against the combination of all identified carbohydrate and glycolipid ions.

| <b>Fragmentation Assignment</b>      | <b>Experimental m/z</b> | <b>Theoretical m/z</b> | <b>ppm</b> | <b>I%</b> |
|--------------------------------------|-------------------------|------------------------|------------|-----------|
| <b><i>Carbohydrate fragments</i></b> |                         |                        |            |           |
| B1                                   | 204.0892                | 204.0872               | 9.80       | 5.83      |
| B2Y2a/2b                             | 366.1415                | 366.1395               | 5.46       | 1.29      |
| B3Y2a/2b                             | 528.1941                | 528.1923               | 3.41       | 5.44      |
| B2                                   | 569.2210                | 569.2188               | 3.86       | 0.61      |
| B3                                   | 731.2744                | 731.2717               | 3.69       | 13.96     |
| <b><i>Glycolipid fragments</i></b>   |                         |                        |            |           |
| Z0                                   | 628.4421                | 628.4432               | -1.75      | 10.87     |
| Y0                                   | 646.4542                | 646.4527               | 2.32       | 11.40     |
| Z1                                   | 790.4930                | 790.4961               | -3.92      | 3.18      |
| Y1                                   | 808.5074                | 808.5066               | 0.99       | 3.00      |
| Y2aZ2                                | 952.5522                | 952.5489               | 3.46       | 8.25      |
| Y2ab                                 | 970.5573                | 970.5595               | -2.27      | 16.61     |
| Z2                                   | 1155.6256               | 1155.6283              | -2.34      | 9.05      |
| Y2a/Y2b                              | 1173.6396               | 1173.6388              | 0.68       | 10.51     |
